# Supplementary material
Source: PubMed Central journal article supplement (PMC4544046)
Supplement: ncomms7790-s1.pdf [file ncomms7790-s1.pdf]

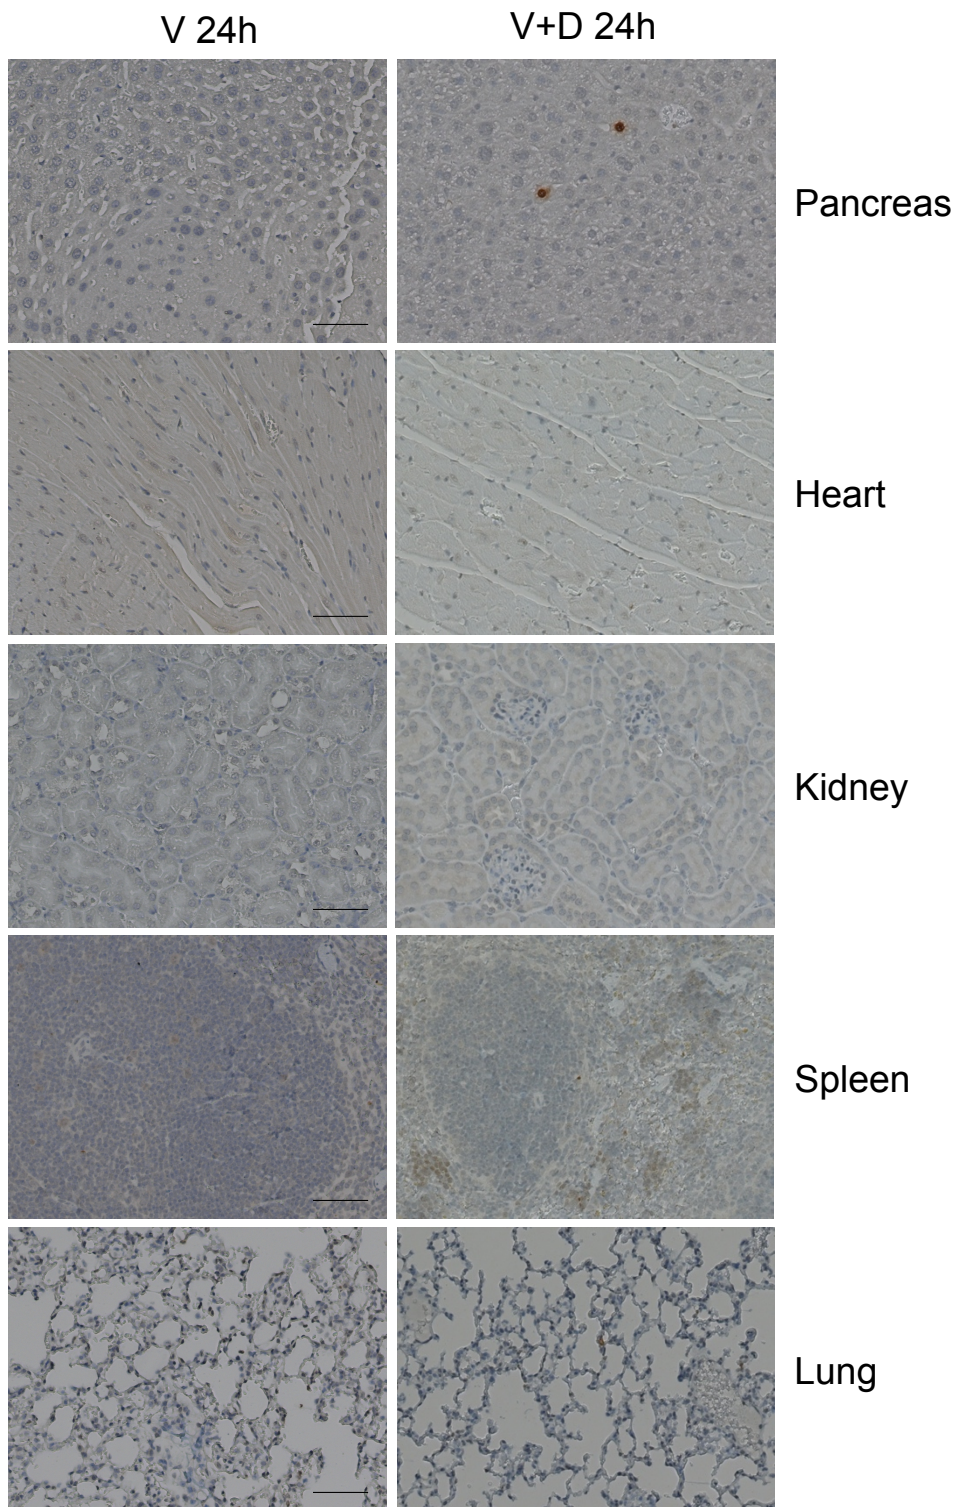

**Supplementary Figure 1.**  $\gamma$ -H2AX staining in various tissues. Tissues were harvested 24 hours after Sacl adenoviral injection (V) with either no DOX or DOX (+D) in drinking water and stained for  $\gamma$ -H2AX. Images were acquired at 20X magnification. Scale bar = 100 $\mu$ M.

**a**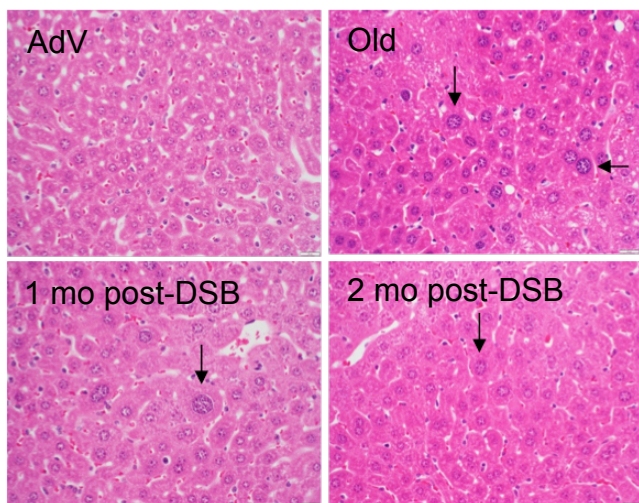**b**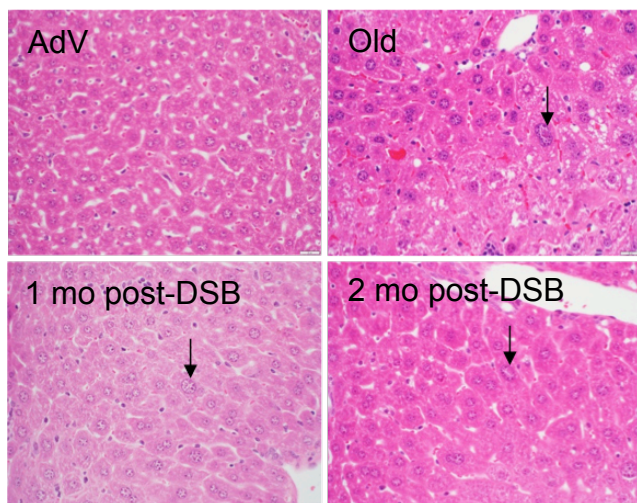**c**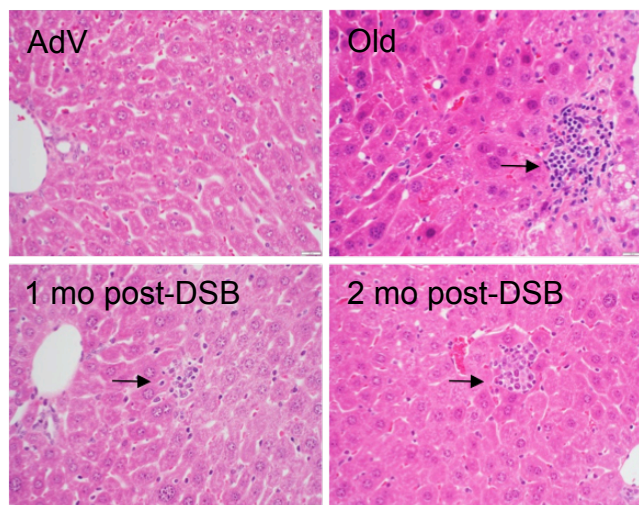**d**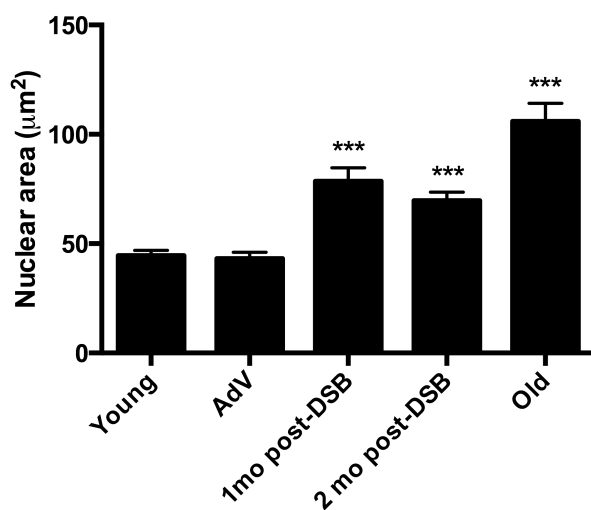

**Supplementary Figure 2. DSB-induced pathologies.** Liver sections were stained with H&E and normal aging pathological characteristics assessed for Table 2. Representative images for (a) karyomegaly (black arrows), (b) intranuclear inclusions (black arrows), and (c) extramedullary hematopoiesis (black arrows). Scale bar (white) = 20µM (d) Liver sections were stained with DAPI and analyzed by confocal microscopy. Nuclear area was then determined using Volocity software for 50 hepatocytes for n=3 for each cohort. Data represents mean ± s.e.m. *P* values were calculated using Mann-Whitney test to AdV samples. \*\*\* *P* < 0.0001

a

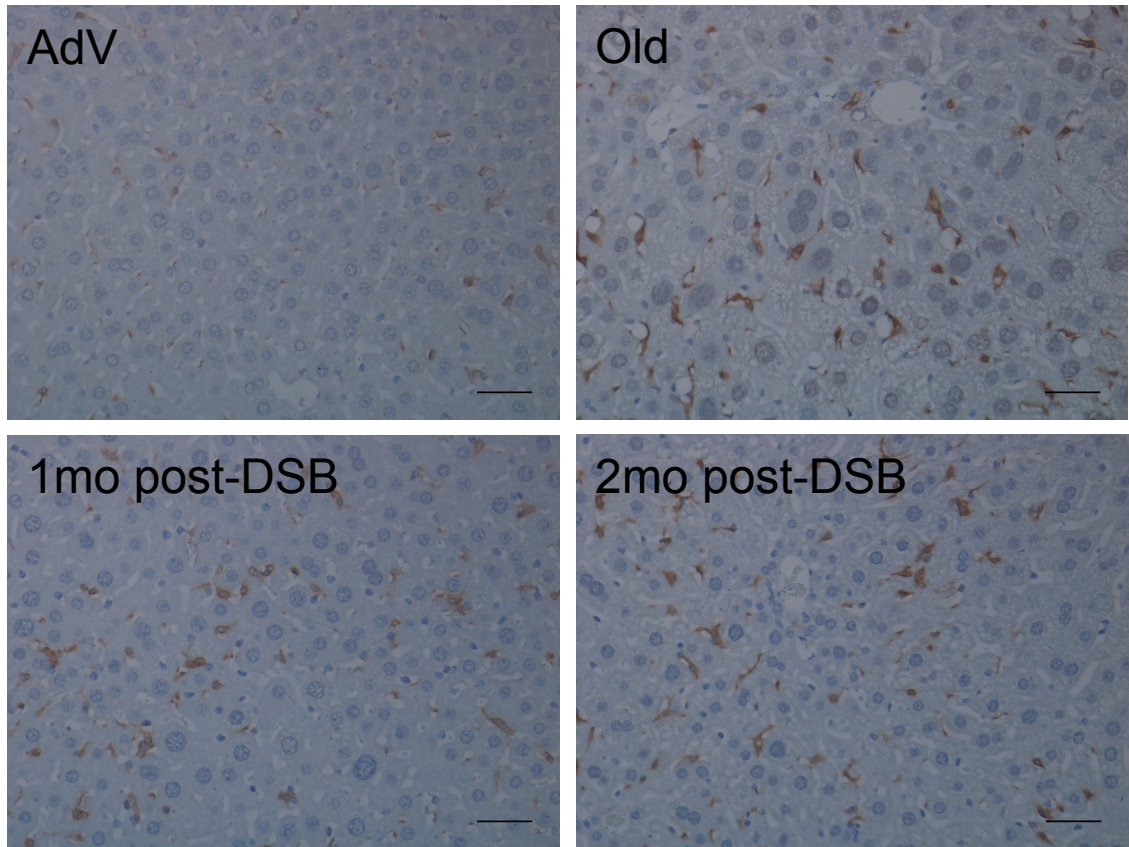

**Supplementary Figure 3.** Representative IBA1 staining for activated macrophages. Images were acquired at 20X magnification and analyzed for Figure 2b. Scale bar = 100 $\mu$ M.

a

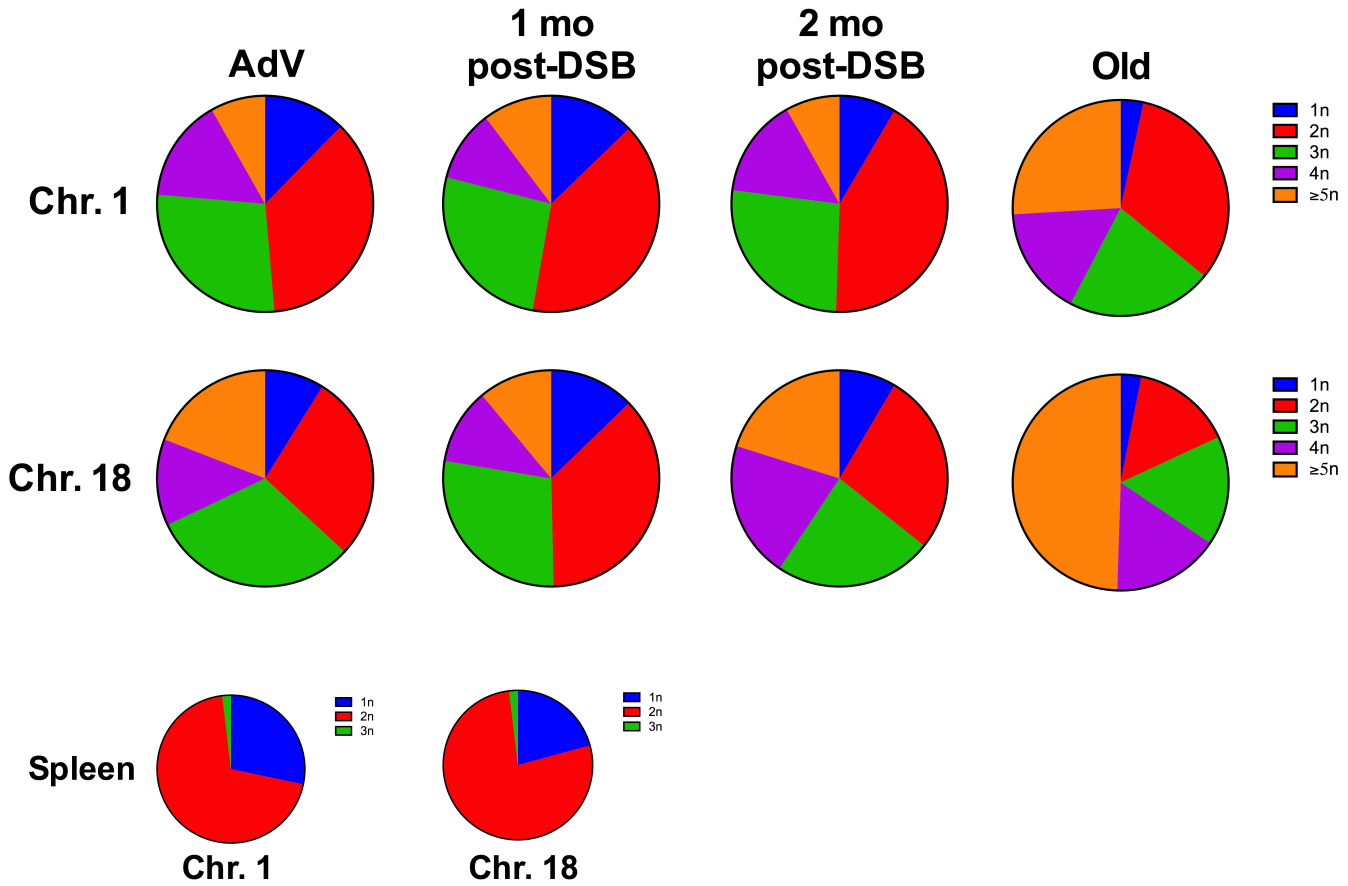

b

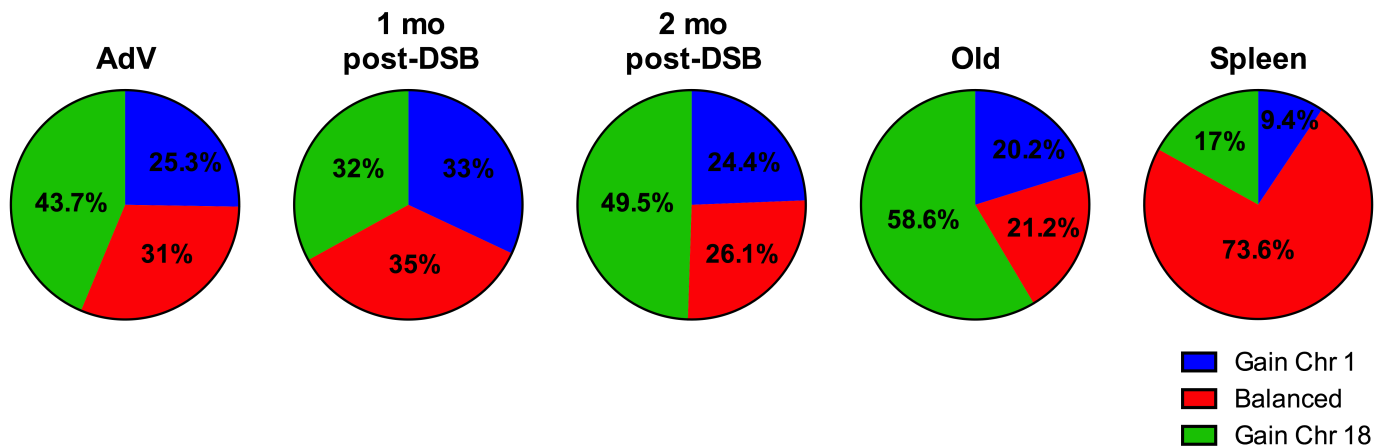

**Supplementary Figure 4. Dual-Color DNA-FISH. (a)** The spectrum of observed ploidy for Chr. 1 and Chr.18 in liver sections as assessed by the number of probes present in each hepatocyte (i.e., two Chr.1 probe signals represent 2n). **(b)** Gains in either Chr. 1 or 18, or the balance of both chromosomes was assessed and calculated as a percent of whole for each cohort (i.e., Chr1/18, 2/2 = balanced, 3/2 = Gain Chr. 1, 2/3 = Gain Chr. 18). For each cohort n=3 where >100 hepatocytes were analyzed per n, except spleen where n=1.

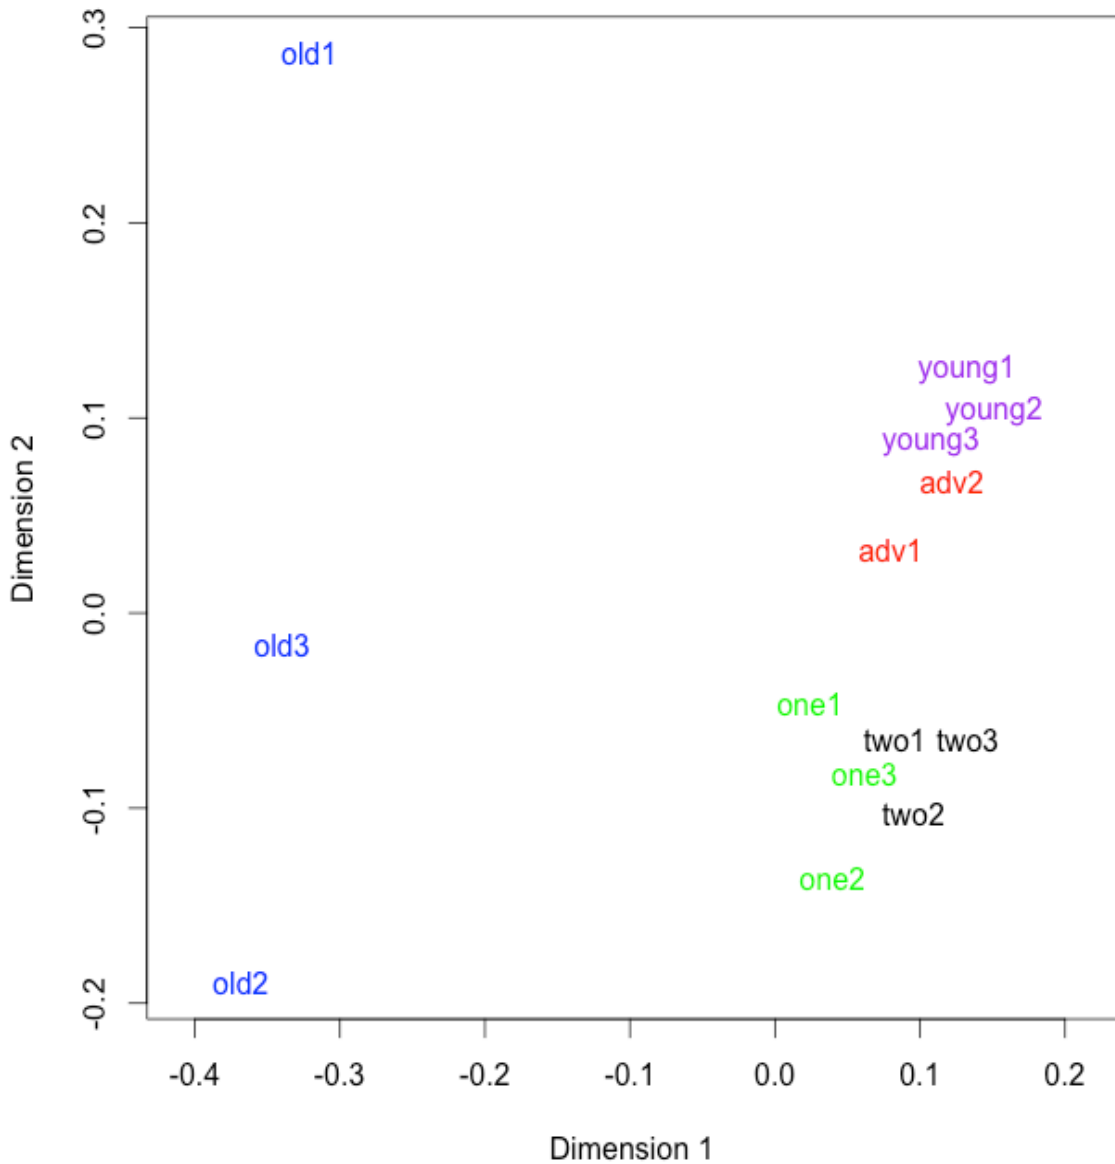

**Supplementary Figure 5.** Principal component analysis of biological replicates for RNA-seq. Reads from each RNA-seq sample were normalized according to library size and then variance stabilized. A principal component plot was then generated using the variance of each sample from the top 25,000 transcripts.

**Supplemental Table 1.** Read statistics for RNA-seq analysis.

| <b>Sample Name</b> | <b>Total Paired-End Reads</b> | <b>Percent of total reads aligned</b> |
|--------------------|-------------------------------|---------------------------------------|
| Old 1              | 36,231,783                    | 81.74                                 |
| Old 2              | 24,838,760                    | 89.51                                 |
| Old 3              | 31,696,717                    | 90.51                                 |
| Young 1            | 24,688,962                    | 86.71                                 |
| Young 2            | 27,872,770                    | 87.80                                 |
| Young 3            | 35,410,902                    | 85.76                                 |
| AdV 1              | 50,799,631                    | 85.85                                 |
| AdV 2              | 39,795,094                    | 89.50                                 |
| 1mo post-DSB 1     | 35,601,195                    | 80.64                                 |
| 1mo post-DSB 2     | 28,581,527                    | 87.31                                 |
| 1mo post-DSB 3     | 50,534,728                    | 90.53                                 |
| 2mo post-DSB 1     | 38,980,404                    | 90.05                                 |
| 2mo post-DSB 2     | 29,836,415                    | 90.14                                 |
| 2mo post-DSB 3     | 32,458,851                    | 90.51                                 |
